# Supplementary material for: Sequence analysis of the GP5 protein of porcine reproductive and respiratory syndrome virus in Vietnam from 2007 to 2023
Source: Front Microbiol. 2024 Oct 1;15:1475208. doi: 10.3389/fmicb.2024.1475208 (PMC11473425; doi:10.3389/fmicb.2024.1475208)
Supplement: Supplementary file 3 [file Table_3.XLSX]

## Sheet: Sheet1
Supplementary Table S3. Percentage identity of the nucleotide homologies of 80 PRRSV-2 GP5 strains
	1	2	3	4	5	6	7	8	9	10	11	12	13	14	15	16	17	18	19	20	21	22	23	24	25	26	27	28	29	30	31	32	33	34	35	36	37	38	39	40	41	42	43	44	45	46	47	48	49
1	***	90.2	87.1	87.1	86.9	86.6	86.2	87.6	93.2	84.7	85.7	85.2	90	86.1	87.7	91.5	91.5	86.9	85.4	86.7	84.7	84.7	84.7	84.5	84.2	84.2	85.4	84.9	84.1	84.9	85.4	85.2	85.4	84.2	85.7	85.4	85.7	83.4	84.1	84.1	84.1	83.7	83.7	83.4	84.1	83.6	83.6	84.1	84.4
2	10.7	***	87.4	87.7	86.2	87.6	86.2	88.2	94.2	84.7	87.2	85.4	91.9	85.4	88.7	93.2	92	85.1	85.2	86.6	85.2	85.2	85.2	85	85	84.6	83.9	83.9	84.6	83.4	83.9	84.1	83.9	82.8	84.6	83.9	84.6	83.4	83.6	84.2	83.6	83.7	84.1	83.6	83.7	83.9	83.6	84.1	83.9
3	14.7	14.3	***	98	89.4	97.2	95.4	89.7	88.6	90.7	94.7	91	86.7	88.1	90.2	88.7	87.1	88.1	94.2	88.4	85.7	85.7	85.8	85.8	85.5	85.4	88.1	88.4	86.4	87.9	88.4	88.2	88.4	87.4	88.4	88.4	88.4	87.2	87.2	87.6	87.4	86.9	87.2	87.2	87.4	87.1	87.1	87.4	87.4
4	14.7	13.9	2	***	90.4	98.5	96	90.4	89.2	90.4	96.4	90.7	87.4	88.1	90.9	89.1	87.4	88.1	94.9	89.1	86.2	86.2	86.3	86.3	86	85.9	87.7	88.1	87.1	87.6	88.1	87.9	88.1	87.1	88.1	88.1	88.1	86.9	86.9	87.6	87.1	86.9	86.6	86.9	87.1	86.7	86.7	87.1	87.1
5	14.8	15.8	11.7	10.5	***	90.4	88.2	88.2	87.6	86.2	89.6	86.7	86.6	86.7	88.4	88.4	85.6	86.1	88.1	86.6	84.8	84.8	85	85	84.7	84.6	86.9	86.7	85.6	86.7	87.2	86.7	87.2	86.1	87.2	87.2	87.2	85.9	86.2	87.7	86.2	86.6	86.6	86.1	86.2	86.1	86.4	86.6	86.7
6	15.3	14.1	2.9	1.5	10.5	***	94.9	89.6	88.6	89.7	96	90.5	86.2	87.6	89.7	88.7	87.1	87.2	93.9	88.9	84.8	84.8	85	85	84.7	84.6	87.4	87.7	86.7	87.2	87.7	87.6	87.7	86.7	87.7	87.7	87.7	85.9	86.1	86.6	86.4	85.9	85.9	85.9	86.2	85.7	85.7	86.4	86.4
7	15.7	15.8	4.8	4.1	13.2	5.4	***	88.1	87.2	88.6	94.2	89.6	86.9	87.6	88.2	87.9	86.4	86.7	94.9	88.6	86.2	86.2	86.3	86.3	86	85.9	86.9	86.9	85.9	86.7	87.2	87.1	87.2	85.7	87.2	87.2	87.2	85.6	85.6	86.2	86.1	85.7	85.6	85.6	85.7	85.4	85.6	85.7	86.1
8	13.8	13	11.2	10.4	13	11.4	13.3	***	90.4	86.7	88.4	87.7	89.4	88.7	99.2	90.2	87.9	88.7	86.9	87.7	84.7	84.7	85.2	85.2	84.2	84.4	85.9	86.1	83.9	85.7	86.2	86.4	86.2	84.6	86.2	86.2	86.2	86.1	86.9	86.9	86.1	86.4	86.7	86.4	86.7	86.6	86.2	87.1	86.4
9	7.2	6.1	12.8	12	14.1	12.9	14.5	10.4	***	85.7	87.9	86.9	93.7	87.6	90.9	97.2	95.9	88.4	86.6	88.7	85.8	85.8	86.2	86	85.3	85.4	86.1	86.4	86.6	85.6	86.1	86.2	86.1	85.7	86.4	86.1	86.4	85.4	85.9	86.2	85.6	86.1	86.1	85.7	85.7	85.9	85.9	86.1	85.9
10	17.7	17.8	10.2	10.6	15.8	11.4	12.8	15	16.5	***	88.6	92.4	84.6	84.9	87.2	87.2	84.6	85.9	88.7	85.6	84.7	84.7	84.5	84.3	84.5	84.4	85.6	85.6	85.1	85.6	86.1	85.7	85.9	84.9	85.9	85.9	85.9	85.4	85.4	85.7	85.4	85.4	85.1	85.1	85.9	85.2	85.2	86.2	85.6
11	16.4	14.5	5.6	3.8	11.5	4.1	6.1	12.9	13.7	12.8	***	89.4	86.4	86.6	88.6	88.6	86.4	86.1	92.4	87.7	85.5	85.5	85.7	85.7	85.3	85.2	87.1	87.2	86.2	86.9	87.4	87.2	87.4	85.9	87.4	87.4	87.4	86.2	85.9	86.9	86.4	86.2	86.2	86.2	86.1	86.1	86.1	86.4	86.4
12	17.1	16.9	9.8	10.2	15.1	10.4	11.6	13.7	15	8.2	11.8	***	85.9	86.4	88.2	88.1	85.7	87.4	88.2	86.1	85.5	85.5	85.3	85.2	85	85.2	85.9	85.9	85.1	85.7	86.2	86.1	86.2	84.9	85.9	86.2	85.9	85.2	85.4	85.9	85.4	85.6	85.6	85.2	85.6	85.4	85.4	85.7	85.4
13	10.9	8.8	15.2	14.4	15.4	15.9	15	11.7	6.7	18.1	15.7	16.3	***	86.7	89.9	93.7	90.9	86.6	85.6	85.6	84.7	84.7	85	84.5	84.2	84.4	84.7	84.7	84.6	84.2	84.7	84.9	84.7	83.4	85.1	84.7	85.1	85.2	85.6	85.6	84.6	85.6	85.6	85.6	85.6	85.7	85.4	85.2	84.9
14	15.8	16.7	13.3	13.3	14.9	13.9	13.9	12.3	13.9	17.4	15.2	15.4	15	***	89.1	88.2	86.7	95.5	86.4	87.7	84.8	84.8	84.8	84.8	84.3	84.2	85.4	86.1	83.4	85.2	85.7	85.9	85.7	84.2	85.7	85.7	85.7	83.4	83.9	84.2	83.4	83.7	84.1	83.4	84.1	83.9	83.6	84.1	83.7
15	13.8	12.6	10.8	10	13	11.4	13.3	0.7	9.9	14.5	12.9	13.2	11.2	12	***	90.2	88.2	89.2	87.4	87.6	84.7	84.7	85.2	85.2	84.2	84.4	85.9	86.1	83.9	85.7	86.2	86.4	86.2	84.6	86.2	86.2	86.2	86.2	87.1	87.1	86.2	86.6	86.9	86.6	86.9	86.7	86.4	87.2	86.6
16	9.1	7.2	12.6	12.2	13	12.7	13.7	10.6	2.9	14.5	12.8	13.5	6.7	13.1	10.8	***	93.4	88.2	86.7	89.1	85.2	85.2	85.5	85	84.7	84.9	86.6	86.6	88.4	86.1	86.6	86.7	86.6	85.6	86.9	86.6	86.9	85.6	86.2	86.6	85.7	86.2	86.2	85.9	85.9	86.1	86.1	86.2	86.1
17	9.1	8.5	14.7	14.3	16.6	14.7	15.5	13.4	4.3	18	15.5	16.4	9.9	15	13.2	7.1	***	87.1	85.6	86.4	86	86	86	85.8	85.5	85.4	85.7	86.4	84.2	85.2	85.7	85.6	85.7	85.4	86.1	85.7	86.1	84.1	83.9	84.6	83.9	84.7	85.1	84.1	84.2	84.6	84.6	84.6	84.2
18	14.8	17.2	13.4	13.4	15.9	14.4	15.1	12.3	12.9	16.1	15.9	14.2	15.3	4.6	11.9	13.2	14.6	***	85.9	88.6	85.7	85.7	85.7	85.5	85.2	85.1	84.7	85.4	83.7	84.6	85.1	85.2	85.1	84.1	85.1	85.1	85.1	84.7	85.6	85.9	85.1	85.1	85.1	84.7	85.7	85.2	84.9	85.7	85.4
19	16.8	17.1	6.1	5.4	13.4	6.5	5.4	14.7	15.4	12.6	8.2	13.2	16.7	15.4	14.3	15.2	16.6	16.1	***	87.6	85.8	85.8	86.3	86.3	85.7	85.4	86.9	86.7	85.4	86.7	87.2	87.1	87.2	85.7	87.2	87.2	87.2	85.2	85.2	85.9	85.7	85.4	85.2	85.6	85.1	85.1	85.2	85.4	85.7
20	15	15.3	13	12.2	15.3	12.4	12.7	13.6	12.6	16.6	13.8	16	16.7	13.7	14	12.2	15.5	12.7	14	***	85.5	85.5	85.5	85.5	85.3	85.2	85.7	85.7	83.3	85.6	86.1	86.2	86.1	85.6	86.1	86.1	86.1	84.7	84.2	84.6	84.2	85.1	84.7	84.7	84.9	84.9	85.2	85.1	84.6
21	17.7	17.1	16.4	15.8	17.5	17.6	15.7	17.6	16.3	17.7	16.6	16.7	17.8	17.4	17.8	17.1	15.9	16.3	16.1	16.6	***	100	99.5	99	99.5	98.8	84.5	84	82.3	84.5	84.8	84.3	84.5	83.7	84.8	84.5	84.8	83.7	83.7	85	84	83.7	83.3	83.7	83.7	83.8	83.8	84	84.3
22	17.7	17.1	16.4	15.8	17.5	17.6	15.7	17.6	16.3	17.7	16.6	16.7	17.8	17.4	17.8	17.1	15.9	16.3	16.1	16.6	0	***	99.5	99	99.5	98.8	84.5	84	82.3	84.5	84.8	84.3	84.5	83.7	84.8	84.5	84.8	83.7	83.7	85	84	83.7	83.3	83.7	83.7	83.8	83.8	84	84.3
23	17.7	17.1	16.2	15.5	17.3	17.3	15.5	16.9	15.8	18	16.4	16.9	17.4	17.4	17.1	16.7	15.9	16.3	15.4	16.6	0.5	0.5	***	99.5	99	98.3	84.3	83.8	82.2	84.3	84.7	84.2	84.3	83.5	84.7	84.3	84.7	83.8	84.2	85.2	84.2	83.8	83.5	84.2	83.8	84	84	84.2	84.5
24	17.9	17.3	16.2	15.5	17.3	17.3	15.4	16.9	16	18.2	16.4	17.1	18	17.4	17.1	17.3	16.1	16.5	15.4	16.6	1	1	0.5	***	98.5	97.8	84.2	83.7	82	84.2	84.5	84	84.2	83.3	84.5	84.2	84.5	83.7	84	85	84	83.7	83.3	84	83.7	83.8	83.8	84	84.3
25	18.4	17.3	16.6	16	17.7	17.8	15.9	18.3	16.9	17.9	16.8	17.3	18.5	18	18.5	17.8	16.6	17	16.3	16.8	0.5	0.5	1	1.5	***	98.3	84	83.5	81.8	84	84.3	83.8	84	83.2	84.3	84	84.3	83.2	83.2	84.5	83.5	83.2	82.8	83.2	83.2	83.3	83.3	83.5	83.8
26	18.2	17.9	16.8	16.1	17.9	17.9	16	18	16.8	18.1	17	17	18.2	18.1	18.2	17.5	16.7	17.1	16.7	16.9	1.2	1.2	1.7	2.2	1.7	***	84.1	83.6	82.4	83.9	84.4	83.9	84.1	83.3	84.4	84.1	84.4	84.2	84.2	85.2	84.6	84.2	83.9	84.2	84.2	84.4	84.4	84.6	84.9
27	16.6	18.8	13.3	13.8	14.8	14.2	14.8	16	15.9	16.5	14.6	16.1	17.7	16.6	16.2	15.3	16.3	17.5	14.8	16.3	17.8	17.8	18	18.3	18.5	18.4	***	98.5	89.4	98.8	99.3	99.2	99.7	96.7	99.3	99.7	99.3	88.2	88.1	88.7	88.1	88.2	88.2	88.2	88.6	88.4	88.4	88.9	88.2
28	17.3	18.8	12.9	13.3	15	13.7	14.7	15.7	15.4	16.5	14.3	16.1	17.7	15.7	15.9	15.3	15.4	16.6	15	16.2	18.5	18.5	18.7	18.9	19.2	19.1	1.5	***	89.1	98.3	98.8	98.3	98.8	96.2	98.5	98.8	98.5	88.1	87.9	88.6	87.9	88.1	88.1	88.1	88.4	88.6	88.2	88.7	88.1
29	18.2	17.7	15.3	14.4	16.4	14.9	15.9	18.5	15.1	17	15.5	17	17.7	19.1	18.7	12.8	18.1	18.7	16.6	19.5	20.6	20.6	20.9	21.1	21.3	20.5	11.7	12	***	88.9	89.4	89.2	89.4	88.9	89.7	89.4	89.7	85.2	85.9	86.6	85.9	85.7	85.4	85.6	86.2	85.4	85.6	86.2	86.1
30	17.3	19.5	13.5	13.9	15	14.4	14.9	16.1	16.5	16.5	14.7	16.3	18.4	16.8	16.3	15.9	16.9	17.7	15	16.4	17.8	17.8	18	18.2	18.4	18.6	1.2	1.7	12.2	***	99.5	98.7	99.2	96.5	98.8	99.2	98.8	88.4	88.2	88.9	88.2	88.4	88.4	88.4	88.7	88.6	88.6	89.1	88.4
31	16.6	18.8	12.9	13.3	14.4	13.8	14.3	15.5	15.9	15.8	14.1	15.7	17.7	16.2	15.7	15.3	16.3	17.1	14.4	15.8	17.4	17.4	17.6	17.8	18	17.9	0.7	1.2	11.7	0.5	***	99.2	99.7	97	99.3	99.7	99.3	88.9	88.7	89.4	88.7	88.9	88.9	88.9	89.2	89.1	89.1	89.6	88.9
32	16.8	18.6	13.1	13.5	15	13.9	14.5	15.3	15.6	16.3	14.3	15.9	17.5	15.9	15.5	15.1	16.5	16.8	14.6	15.6	18	18	18.3	18.5	18.7	18.6	0.8	1.7	11.8	1.3	0.8	***	99.5	96.2	98.8	99.5	98.8	88.1	87.9	88.6	87.9	88.1	88.1	88.1	88.4	88.2	88.2	88.7	88.1
33	16.6	18.8	12.9	13.3	14.4	13.8	14.3	15.5	15.9	16.1	14.1	15.7	17.7	16.2	15.7	15.3	16.3	17.1	14.4	15.8	17.8	17.8	18	18.3	18.5	18.4	0.3	1.2	11.7	0.8	0.3	0.5	***	96.7	99.3	100	99.3	88.6	88.4	89.1	88.4	88.6	88.6	88.6	88.9	88.7	88.7	89.2	88.6
34	18.2	20.5	14.1	14.6	15.9	15	16.3	17.8	16.3	17.4	16.1	17.4	19.6	18.1	18	16.6	16.7	18.4	16.3	16.5	18.9	18.9	19.2	19.4	19.6	19.5	3.4	3.9	12.3	3.6	3.1	4	3.4	***	96.7	96.7	96.7	87.4	87.1	87.4	87.2	87.7	87.7	87.7	87.7	87.6	87.9	88.1	87.4
35	16.2	17.9	12.9	13.3	14.4	13.8	14.3	15.5	15.4	16.1	14.1	16.1	17.3	16.2	15.7	14.9	15.8	17.1	14.4	15.8	17.4	17.4	17.6	17.8	18	17.9	0.7	1.5	11.2	1.2	0.7	1.2	0.7	3.4	***	99.3	100	88.2	88.4	89.1	88.4	88.2	88.2	88.2	88.9	88.4	88.4	89.2	88.6
36	16.6	18.8	12.9	13.3	14.4	13.8	14.3	15.5	15.9	16.1	14.1	15.7	17.7	16.2	15.7	15.3	16.3	17.1	14.4	15.8	17.8	17.8	18	18.3	18.5	18.4	0.3	1.2	11.7	0.8	0.3	0.5	0	3.4	0.7	***	99.3	88.6	88.4	89.1	88.4	88.6	88.6	88.6	88.9	88.7	88.7	89.2	88.6
37	16.2	17.9	12.9	13.3	14.4	13.8	14.3	15.5	15.4	16.1	14.1	16.1	17.3	16.2	15.7	14.9	15.8	17.1	14.4	15.8	17.4	17.4	17.6	17.8	18	17.9	0.7	1.5	11.2	1.2	0.7	1.2	0.7	3.4	0	0.7	***	88.2	88.4	89.1	88.4	88.2	88.2	88.2	88.9	88.4	88.4	89.2	88.6
38	19.4	19.4	14.4	14.8	16.1	16.1	16.5	15.7	16.8	16.7	15.6	17	17	19.3	15.6	16.6	18.5	17.5	16.9	17.6	18.9	18.9	18.7	18.9	19.6	18.1	13.1	13.3	16.8	12.8	12.2	13.3	12.6	14.1	13.1	12.6	13.1	***	97.7	97.7	97.7	99.2	98.7	99.3	97.8	99.5	99.5	98.5	98.2
39	18.5	19.2	14.4	14.8	15.6	15.9	16.5	14.6	16.1	16.7	16.1	16.7	16.5	18.6	14.6	15.6	18.7	16.4	16.9	18.2	18.9	18.9	18.2	18.4	19.6	18.1	13.3	13.5	15.9	13	12.4	13.5	12.8	14.5	12.8	12.8	12.8	2.4	***	98.3	98.3	97.8	97.3	98	98.5	97.8	97.8	98.8	98.8
40	18.4	18.3	13.9	13.9	13.7	15.2	15.6	14.6	15.6	16.3	14.8	16.1	16.5	18.1	14.6	15.2	17.8	16	16	17.8	17.1	17.1	16.9	17.1	17.8	16.8	12.4	12.6	15	12.2	11.6	12.6	12	14.1	12	12	12	2.4	1.7	***	98	97.8	97.3	97.7	97.8	97.8	97.8	98.5	98.5
41	18.4	19.1	14.1	14.5	15.6	15.4	15.8	15.6	16.5	16.6	15.4	16.7	17.8	19.2	15.6	16.3	18.7	17	16.2	18.2	18.4	18.4	18.2	18.4	19.1	17.6	13.2	13.4	15.8	13	12.4	13.4	12.8	14.3	12.8	12.8	12.8	2.4	1.7	2	***	97.8	97.3	97.7	98.2	97.8	97.8	98.8	99.5
42	18.9	19	14.8	14.8	15.2	16.1	16.3	15.2	15.9	16.7	15.6	16.5	16.5	18.8	15.2	15.7	17.6	17.1	16.7	17.2	18.9	18.9	18.7	18.9	19.6	18.1	13.1	13.3	16.1	12.8	12.2	13.3	12.6	13.7	13.1	12.6	13.1	0.8	2.2	2.2	2.2	***	98.5	99.2	98	99.3	99.7	98.7	98.3
43	18.9	18.5	14.4	15.2	15.2	16.1	16.5	14.8	15.9	17.2	15.6	16.5	16.5	18.4	14.8	15.7	17.2	17.1	16.9	17.6	19.4	19.4	19.1	19.3	20	18.6	13.1	13.3	16.6	12.8	12.2	13.3	12.6	13.7	13.1	12.6	13.1	1.3	2.7	2.7	2.7	1.5	***	98.7	97.5	98.8	98.8	98.2	97.8
44	19.4	19.2	14.4	14.8	15.9	16.1	16.5	15.2	16.3	17.2	15.6	17	16.5	19.3	15.2	16.1	18.5	17.5	16.5	17.6	18.9	18.9	18.2	18.4	19.6	18.1	13.1	13.3	16.3	12.8	12.2	13.3	12.6	13.7	13.1	12.6	13.1	0.7	2	2.4	2.4	0.8	1.3	***	97.8	99.5	99.5	98.5	98.2
45	18.4	18.9	14.1	14.6	15.6	15.6	16.3	14.8	16.3	16	15.8	16.5	16.5	18.4	14.8	16.1	18.2	16.2	17.1	17.4	18.9	18.9	18.6	18.8	19.5	18.1	12.6	12.8	15.4	12.4	11.8	12.8	12.2	13.6	12.2	12.2	12.2	2.2	1.5	2.2	1.8	2	2.5	2.2	***	98	98	99.3	98.7
46	19.1	18.7	14.6	15	15.9	16.4	16.7	15	16.1	16.9	15.9	16.8	16.3	18.6	15	15.9	17.8	16.9	17.2	17.4	18.7	18.7	18.4	18.6	19.3	17.9	12.9	12.6	16.6	12.6	12	13	12.4	13.9	12.9	12.4	12.9	0.5	2.2	2.2	2.2	0.7	1.2	0.5	2	***	99.7	98.7	98.3
47	19.1	19.2	14.6	15	15.4	16.4	16.5	15.5	16.1	16.9	15.9	16.8	16.7	19.1	15.4	15.9	17.8	17.3	16.9	17	18.7	18.7	18.4	18.6	19.3	17.9	12.9	13	16.3	12.6	12	13	12.4	13.5	12.9	12.4	12.9	0.5	2.2	2.2	2.2	0.3	1.2	0.5	2	0.3	***	98.7	98.3
48	18.4	18.5	14.1	14.6	15.2	15.5	16.3	14.4	15.9	15.6	15.4	16.3	17	18.4	14.3	15.7	17.8	16.2	16.7	17.2	18.4	18.4	18.2	18.4	19.1	17.7	12.2	12.4	15.5	12	11.4	12.4	11.8	13.3	11.8	11.8	11.8	1.5	1.2	1.5	1.2	1.3	1.9	1.5	0.7	1.3	1.3	***	99.3
49	17.9	18.7	14.1	14.6	15	15.4	15.8	15.2	16.1	16.5	15.4	16.7	17.4	18.8	15.2	15.9	18.3	16.6	16.2	17.8	18	18	17.8	18	18.7	17.2	13	13.2	15.7	12.8	12.2	13.2	12.6	14.1	12.6	12.6	12.6	1.9	1.2	1.5	0.5	1.7	2.2	1.9	1.3	1.7	1.7	0.7	***
50	19.1	18.2	14.7	15.2	15.6	16.1	16.5	15.8	16	18	15.6	17.4	16.7	19.3	15.8	16.3	17.3	17.7	16.9	17.4	19.3	19.3	19.1	19.3	20	18.5	13.9	14.1	17.6	13.6	13	13.9	13.5	14.1	13.9	13.5	13.9	2	3.4	3.4	3.4	2.2	1.7	2	2.5	1.9	1.9	2.5	2.9
51	18.4	18.5	14.3	14.8	15.2	15.7	16.5	15	15.8	16.2	15.6	16.5	17.2	18.6	15	15.6	18	16.4	16.9	17.6	18.2	18.2	18	18.2	18.9	17.4	12.8	13	15.4	12.6	12	13	12.4	13.9	12.4	12.4	12.4	1.7	1	1.3	1	1.5	2	1.7	1.2	1.5	1.5	0.5	0.5
52	19.4	18.5	14.8	15.7	15.6	16.6	17	15.7	16.3	17.6	16.1	17.4	17	18.8	15.6	16.1	17.6	17.1	17.4	18.1	18.9	18.9	18.7	18.9	19.6	18.1	13.5	13.7	16.8	13.2	12.6	13.7	13.1	14.1	13.5	13.1	13.5	1.3	2.7	2.7	2.7	1.5	1	1.3	2.5	1.2	1.2	1.9	2.2
53	18.9	18.5	14.4	15.2	15.2	16.1	16.5	14.8	15.9	17.2	15.6	16.5	16.5	18.4	14.8	15.7	17.2	17.1	16.9	17.6	19.4	19.4	19.1	19.3	20	18.6	13.1	13.3	16.6	12.8	12.2	13.3	12.6	13.7	13.1	12.6	13.1	1.3	2.7	2.7	2.7	1.5	0	1.3	2.5	1.2	1.2	1.9	2.2
54	19.2	19.3	15.3	15.8	16.2	17.1	17.5	15.6	16.6	17.7	16.2	17.5	17.1	19.4	15.8	16.7	18.4	17.7	17.9	17.7	19.5	19.5	19.2	19.5	20.2	18.7	13.4	13.6	17.3	13.2	12.6	13.6	13	14	13.4	13	13.4	1.5	3.2	3.2	3.2	1.7	1.7	1.5	3.1	1.3	1.3	2.4	2.7
55	19.1	18.7	14.6	15	15.9	16.4	16.7	15	16.1	16.9	15.9	16.8	16.3	18.6	15	15.9	17.8	16.9	17.2	17.4	18.7	18.7	18.4	18.6	19.3	17.9	12.9	12.6	16.6	12.6	12	13	12.4	13.9	12.9	12.4	12.9	0.5	2.2	2.2	2.2	0.7	1.2	0.5	2	0	0.3	1.3	1.7
56	18.7	18	13.9	14.8	14.3	15.2	16.1	14.8	15.9	17.2	15.2	16.5	16.1	17.9	14.8	15.7	17.2	17.1	16.5	17.6	18.4	18.4	18.2	18.4	19.1	17.7	12.6	12.8	16.8	12.4	11.8	12.8	12.2	13.7	12.6	12.2	12.6	1.7	3.1	2.7	3.1	1.9	1	1.7	2.9	1.5	1.5	2.2	2.5
57	18.6	18.7	14.6	15	15.4	15.9	16.3	15.2	15.6	16.5	15.8	16.7	16.9	18.4	15.2	15.4	18.3	16.2	17.1	17.4	18.5	18.5	18.2	18.4	19.1	17.7	12.6	12.8	15.2	12.4	11.8	12.8	12.2	13.7	12.2	12.2	12.2	1.9	1.2	1.5	1.2	1.7	2.2	1.9	1.3	1.7	1.7	0.7	0.7
58	18.4	18.9	14.6	15	16.1	16.3	16.7	15.2	16.3	16	16.3	16.7	17.4	18.8	14.7	16.1	18.3	16.6	17.1	18.1	18.9	18.9	18.6	18.9	19.5	18.1	13	13.2	16.3	12.8	12.2	13.2	12.6	14.1	12.6	12.6	12.6	2.2	1.8	2.2	1.8	2	2.5	2.2	1	2	2	0.7	1.3
59	18.9	19.7	14.8	15.2	15.8	16.3	17.4	14.6	16.7	17.1	16.3	16.7	16.8	19.5	14.8	16.3	18.7	17.3	17.8	19.1	18.9	18.9	18.6	18.9	19.5	18.1	13.3	13.5	16.1	13	12.4	13.5	12.8	14.9	12.8	12.8	12.8	3.8	2.7	3.1	3.4	3.6	4.1	3.8	1.9	3.6	3.6	2.2	2.9
60	18	17.8	14.2	13.8	14.4	15.1	15.2	14.6	14.4	16.7	14.6	16.3	16.3	17	14.6	14.6	16.5	16.7	16.3	16.3	18.2	18.2	18	18.2	18.9	17.9	9.7	10	14.9	9.4	8.9	9.8	9.3	10.8	9.5	9.3	9.5	7	7.6	6.5	7.8	6.9	6.7	6.7	6.8	6.9	6.9	6.5	7.2
61	18.2	18.2	14.1	14.6	15	15.4	16.3	14.8	15.6	16	15.4	16.3	16.9	18.4	14.7	15.4	17.8	16.2	16.7	17.4	18	18	17.8	18	18.7	17.2	12.6	12.8	15.2	12.4	11.8	12.8	12.2	13.7	12.2	12.2	12.2	1.5	0.8	1.2	0.8	1.3	1.9	1.5	1	1.3	1.3	0.3	0.3
62	18.2	18.5	14.1	14.6	15	15.5	16.3	14.8	15.9	16	15.4	16.3	17.2	18.4	14.8	15.4	18.1	16.2	16.7	17.8	18.3	18.3	18	18.2	18.9	17.5	12.6	12.8	15.2	12.4	11.8	12.8	12.2	13.9	12.2	12.2	12.2	1.9	0.8	1.2	1.2	1.7	2.2	1.9	1.2	1.7	1.7	0.7	0.7
63	18.9	19	14.4	14.8	15.6	16.1	16.5	15.2	16.3	16.7	15.6	16.5	16.5	19.3	15.2	16.1	18.1	17.1	16.5	17.6	18.4	18.4	18.2	18.4	19.1	17.7	12.6	12.8	16.3	12.4	11.8	12.8	12.2	13.7	12.6	12.2	12.6	0.7	2	2	2	0.8	1	0.7	1.9	0.5	0.5	1.2	1.5
64	18.9	18.9	14.6	15	15.6	15.9	16.7	15.6	16.3	16	15.8	16.7	17.4	18.8	15.6	15.6	18.3	16.6	17.1	18.1	18.9	18.9	18.6	18.9	19.5	18.1	13.5	13.5	15.9	13.2	12.6	13.7	13	14.5	13	13	13	2.2	1.8	2.2	1.8	2	2.5	2.2	1.5	2	2	1	1.3
65	16.9	17	13.5	13.6	13.3	14.4	14.8	14.2	13.7	16.1	14.4	15	16.2	15.3	14.2	13.3	15.9	14.5	15.6	16.3	17.2	17.2	16.9	17.1	17.8	16.8	9.3	9.7	12.8	9.1	8.5	9.5	8.9	11.3	8.9	8.9	8.9	6.1	5.4	5	5.7	5.7	5.7	6.1	5.2	5.9	5.9	4.8	5.2
66	17.5	17.4	13.5	13.9	13.7	14.8	15.2	15.3	14.5	16.5	14.7	15.8	17	16.1	15.2	14.1	16.7	15.3	15.8	16.4	17.8	17.8	17.5	17.8	18	17.4	10.1	10.4	13.6	9.8	9.3	10.2	9.7	12.1	9.7	9.7	9.7	7	6.3	5.9	6.6	6.6	6.6	7	6.1	6.8	6.8	5.7	6.1
67	18.9	19	14.4	14.8	15.6	16.1	16.5	15.2	16.3	16.3	15.2	16.1	16.5	18.8	14.8	16.1	18.1	17.5	16.9	18.1	18.7	18.7	18.4	18.6	19.3	17.9	12.6	12.8	16.3	12.4	11.8	12.8	12.2	13.7	12.6	12.2	12.6	1	2.4	2.4	2.4	1.2	1	1	2.2	0.8	0.8	1.5	1.9
68	18.4	18.5	14.1	14.6	15.2	15.5	16.3	14.8	15.9	16	15.4	16.3	17	18.4	14.8	15.7	17.8	16.2	16.7	17.6	18.4	18.4	18.2	18.4	19.1	17.7	12.6	12.8	15.5	12.4	11.8	12.8	12.2	13.7	12.2	12.2	12.2	1.5	1.2	1.5	1.2	1.3	1.9	1.5	1	1.3	1.3	0.3	0.7
69	18.6	18.2	13.9	14.4	15.4	15.2	16	14.1	16.1	15.4	15.2	16.1	17.2	18.1	14.1	15.4	18	16	16.5	16.9	18.2	18.2	18	18.2	18.9	17.9	12.4	12.6	15.2	12.2	11.6	12.6	12	13.5	12	12	12	2	1.7	1.7	1.7	1.9	2.4	2	0.8	1.9	1.9	0.5	1.2
70	18.9	19.4	14.6	15	16	16.1	16.7	15.7	16.7	16.4	16.3	16.9	17.4	18.8	15.6	16.1	18.7	16.6	17.6	18.3	19.3	19.3	19.1	19.3	20	18.5	13.9	13.9	15.9	13.5	13	14.1	13.5	14.9	13.5	13.5	13.5	2.5	1.9	2.5	2.2	2.4	2.9	2.5	1.5	2.4	2.4	1.3	1.7
71	20.5	19.7	16.3	15.9	16.1	17.3	17.6	15.7	17.4	17.8	16.8	16.8	17.4	20.2	15.2	17.5	19.5	18.5	18.5	19.5	19.8	19.8	19.6	19.8	20.5	19.5	14.6	14.7	17.4	14.3	13.7	14.7	14.1	15.6	14.6	14.1	14.6	3.1	3.4	3.1	3.4	2.9	3.4	3.1	3.1	2.9	2.9	2.6	2.9
72	17.8	17.9	13.3	13.8	13.8	14.2	15.2	14.7	13.9	16.3	15.7	15.2	16.6	16.4	14.6	14.8	15.6	16.2	16.3	17.2	16.5	16.5	17.2	17.1	17.1	16.8	10.1	10.9	13.8	10	9.7	10.3	10.1	11.3	9.7	10.1	9.7	10.5	10.1	9.3	10.3	10.3	10.1	10.5	9.7	10.3	10.3	9.3	9.7
73	18.4	18.5	14.1	14.6	15.2	15.4	16.3	14.8	15.8	16	15.4	16.3	16.9	18.4	14.7	15.6	17.8	16.2	16.7	17.6	18.4	18.4	18.2	18.4	19.1	17.6	12.6	12.8	15.4	12.4	11.8	12.8	12.2	13.7	12.2	12.2	12.2	1.5	1.2	1.5	1.2	1.3	1.9	1.5	0.7	1.3	1.3	0.3	0.7
74	17.8	17.9	13.3	13.8	13.8	14.2	15.2	14.7	13.9	16.3	15.7	15.2	16.6	16.4	14.6	14.8	15.6	16.2	16.3	17.2	16.5	16.5	17.2	17.1	17.1	16.8	10.1	10.9	13.8	10	9.7	10.3	10.1	11.3	9.7	10.1	9.7	10.5	10.1	9.3	10.3	10.3	10.1	10.5	9.7	10.3	10.3	9.3	9.7
75	18	18.1	14	13.6	13.5	14.9	15	14.6	14.4	16.5	14.4	15.7	16.3	16.2	14.6	14.6	16.5	15.8	15.6	16.3	16.9	16.9	16.7	16.9	17.5	16.6	9.7	10.1	14.2	9.5	8.9	9.9	9.3	11.3	9.5	9.3	9.5	6.5	6.7	5.6	6.8	6.3	6.1	6.5	6.3	6.3	6.3	5.9	6.3
76	18.2	19.2	13.9	14.4	15.4	15.4	16.1	14.6	16	15.8	15.6	16.3	16.7	18.1	14.6	15.8	18	16	16.9	17.1	18.6	18.6	18.4	18.6	19.3	17.8	12.4	12.6	15.6	12.2	11.6	12.6	12	13.4	12	12	12	2	1.3	2	1.7	1.9	2.4	2	0.2	1.9	1.9	0.5	1.2
77	18.1	17.9	14.4	14	14.2	15.8	14.4	14.9	16	17.5	15.5	17.3	17.1	16.5	14.2	16.5	17.3	16.7	16.1	17.5	16.9	16.9	16.7	16.7	17.6	16.6	11.7	11.7	16.7	11.5	10.9	11.9	11.3	13.4	11.3	11.3	11.3	9.5	9.5	8.4	9.7	9.1	9.5	9.5	9.5	9.3	9.3	8.8	9.1
78	19.5	19.4	15.6	15.6	16.3	15.6	17.4	15.3	17.1	18.5	17.2	17.1	17.5	20.4	15.5	17.4	18.9	17.9	18.9	19.3	19.5	19.5	19.3	19.5	20.2	18.7	16.9	17.1	17.4	16.6	16	17.1	16.4	17.8	16.4	16.4	16.4	6.6	5.7	5.9	6.2	6.3	6.6	6.6	5.7	6.4	6.4	5.3	5.7
79	18.8	18.9	14.5	15	15.6	15.9	16.5	15.6	16	16	15.8	16.7	17.1	18.6	15.6	15.4	18.2	16.4	17.1	17.8	18.9	18.9	18.6	18.8	19.5	18.1	13.2	13.2	15.6	12.6	12.4	13.4	12.8	14.3	12.8	12.8	12.8	2.2	1.8	2.2	1.8	2	2.5	2.2	1.5	2	2	1	1.3
80	18.2	18.7	14.4	14.8	15.4	15.7	16.5	15	16.1	16	15.6	16.3	17.2	18.4	15	15.9	18.1	16.2	16.5	17.9	18.4	18.4	18.2	18.4	19.1	17.7	12.4	12.6	15.2	12.2	11.6	12.6	12	13.5	12	12	12	1.7	1.3	1.7	1.3	1.5	2	1.7	1	1.5	1.5	0.5	0.8
	1	2	3	4	5	6	7	8	9	10	11	12	13	14	15	16	17	18	19	20	21	22	23	24	25	26	27	28	29	30	31	32	33	34	35	36	37	38	39	40	41	42	43	44	45	46	47	48	49
[truncated: 33 more columns]
